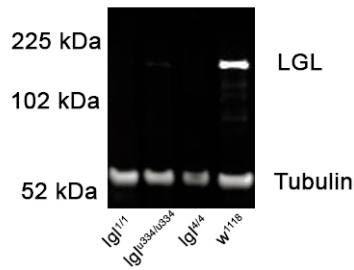

**Fig. S1. Anti-LGL western blot analysis of *lgl* mutant alleles.** Representative anti-LGL western blot comparing the *w<sup>1118</sup>* genetic background control with a *lgl* mutant allelic series. The single ~110kDa band corresponding to the predicted molecular weight of LGL in the *w<sup>1118</sup>* control is undetectable in both *lgl<sup>1/1</sup>* and *lgl<sup>1/4</sup>* mutants, but a very faint band is present in the *lgl<sup>u334</sup>* homozygous mutant. These data are consistent with the published characterizations of the *lgl<sup>1</sup>* and *lgl<sup>1/4</sup>* alleles as protein nulls and *lgl<sup>u334</sup>* as a hypomorphic allele (Mechler et al., 1985).

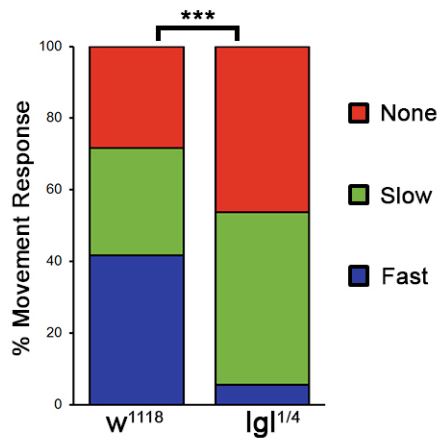

**Fig. S2. Null *lgl* mutant larvae exhibit impaired behavioral movement activity.** Loss of LGL reduces the coordinated motor response in a well-characterized movement escape behavior. Wandering third instars were stimulated with a 45°C probe, and movement response time assayed (see Materials and Methods). In the *w<sup>1118</sup>* genetic background control, 42% of larvae exhibited the stereotyped escape response in  $\leq 1$  second (fast; Blue), 30% responded between 2–10 seconds (slow; Green) and 28% failed to respond (none; Red). In *lgl* nulls (*lgl<sup>1/4</sup>*), only 6% initiated a fast response, 48% exhibited a delayed response, and 46% failed to respond. Statistical comparison Chi<sup>2</sup> test of independence ( $\chi^2 = 20.004$ ,  $P < 0.0001$  (\*\*\*) ;  $N = 114$ ,  $DF = 2$ ).

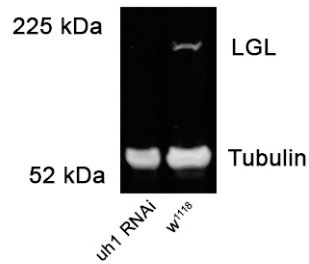

**Fig. S3. Anti-LGL western blot analysis of *lgl* mutant alleles.** Representative anti-LGL western blot comparing the *uh1-Gal4/+* genetic background control with *uh1-Gal4* × *lgl* RNAi. The ~110kDa band in the *uh1-Gal4/+* control corresponds to the predicted molecular weight of LGL. This band is undetectable following RNAi knockdown.

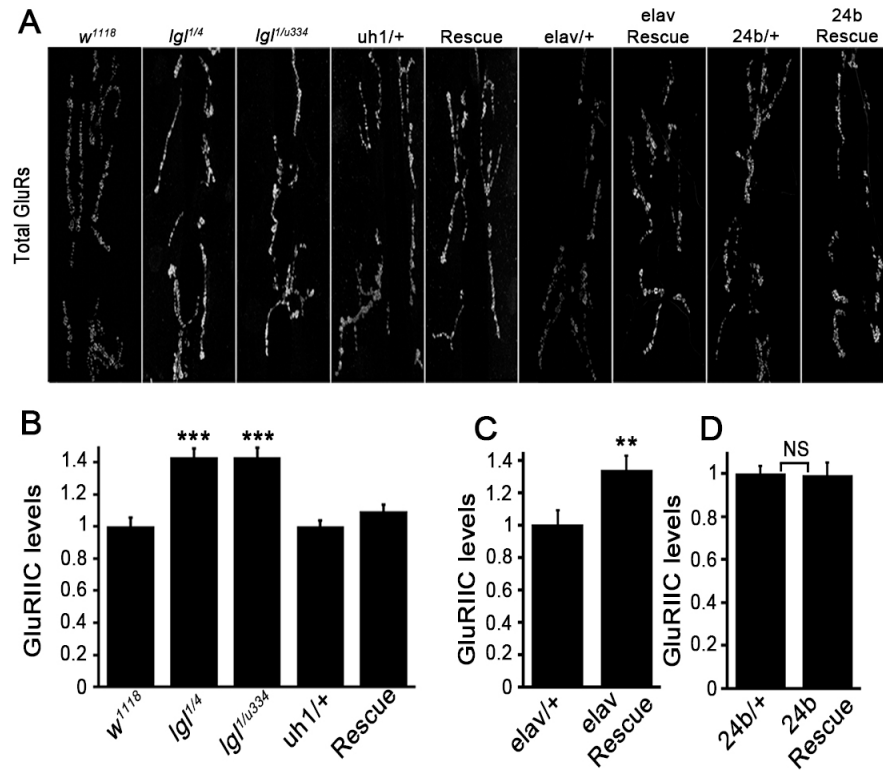

**Fig. S4. High magnification image of panels A–D of Fig. 8.** Loss of LGL induces a net increase in total glutamate receptors (GluRs) caused by the selective elevation of GluRIIB-containing receptors at wandering third instar NMJ synapses. **(A)** Representative muscle 6/7 NMJ images of anti-GluRIIC labeling in control (*w<sup>1118</sup>*) and *lgl* mutant backgrounds, with ubiquitous, neuronal and muscle driven UAS-*lgl* expression. **(B)** Quantification of GluRIIC labeling intensity in *w<sup>1118</sup>* and UAS-*lgl*+/+, *lgl<sup>1/u334</sup>*; *uh1-Gal4*/+ backgrounds compared to *lgl* mutants (N = 12, 12, 12, 13 and 13 NMJs, respectively; Kruskal–Wallis P<0.0001). **(C)** Quantification of GluRIIC intensity in the *elav-Gal4*/+ control versus UAS-*lgl* expression condition (N = 12 NMJs each; P=0.03, Mann–Whitney Test). **(D)** Quantification of GluRIIC intensity in 24b-Gal4/+ control versus UAS-*lgl*+/+, *lgl<sup>1/u334</sup>*; 24b-Gal4/+ condition (N=14 NMJs each; P=0.88).

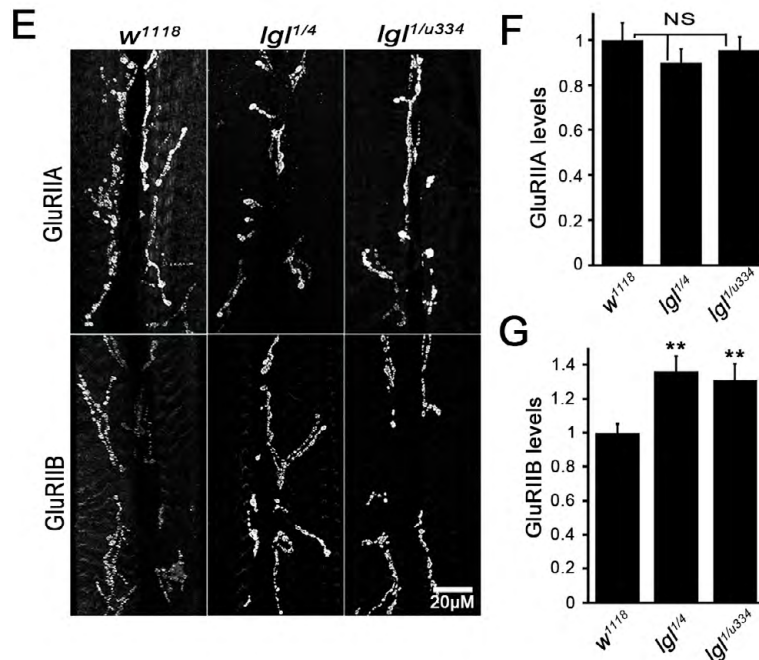

**Fig. S5. High magnification image of panels E–G of Fig. 8.** **(E)** Representative NMJ 6/7 images of anti-GluRIIA/B labeling in control and *lgl* mutants. **(F)** Quantification of GluRIIA intensity in control and *lgl* mutant backgrounds (N=12 NMJs each; ANOVA P=0.62, not significant (NS)). **(G)** Quantification of GluRIIB intensity in control and *lgl* mutants (N=12 NMJs each; ANOVA P=0.005). Significance shown as not significant (NS), P<0.01 (\*\*) and P<0.001 (\*\*\*).

**Table S1. Post-hoc pairwise comparisons of all experiments analyzed by One-Way ANOVA.** Table showing all pairwise comparisons of individual genotypes and their significance values. **(A)** Fig. 2: All results of Tukey–Kramer post-hoc tests for branch number (left) and bouton number (right). **(B)** Fig. 4: All results for Tukey–Kramer post-hoc tests for evoked junctional current responses for *lgl* mutants, rescue, and controls (left), and Student–Newman–Keuls multiple comparisons for pre- and postsynaptic LGL rescue and RNAi (right). **(C)** Fig. 5: All pairwise comparisons of *lgl* mutants, rescue, and control mEJC data. Dunn’s non-parametric pairwise test for mEJC amplitude (left) and Tukey–Kramer pairwise test for mEJC frequency (right). **(D)** Fig. 6: Results of pairwise comparisons for active zone size (left) and active zone number (right) by Tukey–Kramer. **(E)** Fig. 7: Results of Student–Newman–Keuls multiple comparisons test for FM1-43 unloaded intensity (left) and unloaded/loaded ratio (right). **(F)** Fig. 8: Dunn’s Multiple comparisons test of *lgl* mutants, rescue, and controls for GluRIIC intensity (left) and Student–Newman–Keuls multiple comparisons test for *lgl* mutants and control for GluRIIB intensity.

**(A) Fig. 2. Structure**

| <u>Tukey–Kramer</u>                     |    |                                         |             | <u>Tukey–Kramer</u>                     |    |                                         |           |
|-----------------------------------------|----|-----------------------------------------|-------------|-----------------------------------------|----|-----------------------------------------|-----------|
| <b>Branch number</b>                    |    |                                         |             | <b>Bouton number</b>                    |    |                                         |           |
| <i>w</i> <sup>1118</sup>                | vs | <i>lgl</i> <sup>1/4</sup>               | *** P<0.001 | <i>w</i> <sup>1118</sup>                | vs | <i>lgl</i> <sup>1/4</sup>               | * P<0.05  |
| <i>w</i> <sup>1118</sup>                | vs | <i>lgl</i> <sup>1/4</sup> / <i>u334</i> | ** P<0.01   | <i>w</i> <sup>1118</sup>                | vs | <i>lgl</i> <sup>1/4</sup> / <i>u334</i> | * P<0.05  |
| <i>w</i> <sup>1118</sup>                | vs | <i>uh1-Gal4/+</i>                       | ns P>0.05   | <i>w</i> <sup>1118</sup>                | vs | <i>uh1xw</i>                            | ns P>0.05 |
| <i>w</i> <sup>1118</sup>                | vs | <i>uh1-Gal4 Rescue</i>                  | ns P>0.05   | <i>w</i> <sup>1118</sup>                | vs | <i>uh1-Gal4 Rescue</i>                  | ns P>0.05 |
| <i>lgl</i> <sup>1/4</sup>               | vs | <i>lgl</i> <sup>1/4</sup> / <i>u334</i> | ns P>0.05   | <i>lgl</i> <sup>1/4</sup>               | vs | <i>lgl</i> <sup>1/4</sup> / <i>u334</i> | ns P>0.05 |
| <i>lgl</i> <sup>1/4</sup>               | vs | <i>uh1xw</i>                            | *** P<0.001 | <i>lgl</i> <sup>1/4</sup>               | vs | <i>uh1-Gal4/+</i>                       | * P<0.05  |
| <i>lgl</i> <sup>1/4</sup>               | vs | <i>uh1-Gal4 Rescue</i>                  | *** P<0.001 | <i>lgl</i> <sup>1/4</sup>               | vs | <i>uh1-Gal4 Rescue</i>                  | ** P<0.01 |
| <i>lgl</i> <sup>1/4</sup> / <i>u334</i> | vs | <i>uh1-Gal4/+</i>                       | ** P<0.01   | <i>lgl</i> <sup>1/4</sup> / <i>u334</i> | vs | <i>uh1-Gal4/+</i>                       | * P<0.05  |
| <i>lgl</i> <sup>1/4</sup> / <i>u334</i> | vs | <i>uh1-Gal4 Rescue</i>                  | ** P<0.01   | <i>lgl</i> <sup>1/4</sup> / <i>u334</i> | vs | <i>uh1-Gal4 Rescue</i>                  | ** P<0.01 |
| <i>uh1-Gal4/+</i>                       | vs | <i>uh1-Gal4 Rescue</i>                  | ns P>0.05   | <i>uh1-Gal4/+</i>                       | vs | <i>uh1-Gal4 Rescue</i>                  | ns P>0.05 |

**(B) Fig. 4. EJC**

| <u>Tukey–Kramer</u>                                   |    |                                                       |           | <u>Student–Newman–Keuls multiple comparisons test</u> |    |             |           |
|-------------------------------------------------------|----|-------------------------------------------------------|-----------|-------------------------------------------------------|----|-------------|-----------|
| <i>w</i> <sup>1118</sup>                              | vs | <i>lgl</i> <sup>1/4</sup> / <i>u334</i>               | ** P<0.01 | 24b Rescue                                            | vs | 24b-Gal4/+  | * P<0.05  |
| <i>w</i> <sup>1118</sup>                              | vs | <i>lgl</i> <sup>1/4</sup> / <i>u334</i> / <i>u334</i> | * P<0.05  | 24b Rescue                                            | vs | 24b RNAi    | ns P>0.05 |
| <i>w</i> <sup>1118</sup>                              | vs | <i>lgl</i> <sup>1/1</sup>                             | * P<0.05  | 24b RNAi                                              | vs | 24b-Gal4/+  | * P<0.05  |
| <i>w</i> <sup>1118</sup>                              | vs | <i>uh1-Gal4/+</i>                                     | ns P>0.05 |                                                       |    |             |           |
| <i>w</i> <sup>1118</sup>                              | vs | <i>uh1-Gal4 Rescue</i>                                | ns P>0.05 | ELAV Rescue                                           | vs | ELAV-Gal4/+ | ** P<0.01 |
| <i>lgl</i> <sup>1/4</sup> / <i>u334</i>               | vs | <i>lgl</i> <sup>1/4</sup> / <i>u334</i> / <i>u334</i> | ns P>0.05 | ELAV Rescue                                           | vs | ELAV RNAi   | ns P>0.05 |
| <i>lgl</i> <sup>1/4</sup> / <i>u334</i>               | vs | <i>lgl</i> <sup>1/1</sup>                             | ns P>0.05 | ELAV RNAi                                             | vs | ELAV-Gal4/+ | * P<0.05  |
| <i>lgl</i> <sup>1/4</sup> / <i>u334</i>               | vs | <i>uh1-Gal4/+</i>                                     | ** P<0.01 |                                                       |    |             |           |
| <i>lgl</i> <sup>1/4</sup> / <i>u334</i>               | vs | <i>uh1-Gal4 Rescue</i>                                | * P<0.05  |                                                       |    |             |           |
| <i>lgl</i> <sup>1/4</sup> / <i>u334</i> / <i>u334</i> | vs | <i>lgl</i> <sup>1/1</sup>                             | ns P>0.05 |                                                       |    |             |           |
| <i>lgl</i> <sup>1/4</sup> / <i>u334</i> / <i>u334</i> | vs | <i>uh1-Gal4/+</i>                                     | * P<0.05  |                                                       |    |             |           |
| <i>lgl</i> <sup>1/4</sup> / <i>u334</i> / <i>u334</i> | vs | <i>uh1-Gal4 Rescue</i>                                | * P<0.05  |                                                       |    |             |           |
| <i>lgl</i> <sup>1/1</sup>                             | vs | <i>uh1-Gal4/+</i>                                     | * P<0.05  |                                                       |    |             |           |
| <i>lgl</i> <sup>1/1</sup>                             | vs | <i>uh1-Gal4 Rescue</i>                                | * P<0.05  |                                                       |    |             |           |
| <i>uh1-Gal4/+</i>                                     | vs | <i>uh1-Gal4 Rescue</i>                                | ns P>0.05 |                                                       |    |             |           |

**(C) Fig. 5. mEJC**

| <u>Dunn’s Multiple comparisons test (non-parametric)</u> |    |                                                       |             | <u>Tukey–Kramer</u>      |    |                                                       |             |
|----------------------------------------------------------|----|-------------------------------------------------------|-------------|--------------------------|----|-------------------------------------------------------|-------------|
| <b>Amplitude</b>                                         |    |                                                       |             | <b>Frequency</b>         |    |                                                       |             |
| <i>w</i> <sup>1118</sup>                                 | vs | <i>lgl</i> <sup>1/4</sup> / <i>u334</i>               | *** P<0.001 | <i>w</i> <sup>1118</sup> | vs | <i>lgl</i> <sup>1/4</sup> / <i>u334</i>               | *** P<0.001 |
| <i>w</i> <sup>1118</sup>                                 | vs | <i>lgl</i> <sup>1/4</sup> / <i>u334</i> / <i>u334</i> | ** P<0.01   | <i>w</i> <sup>1118</sup> | vs | <i>lgl</i> <sup>1/4</sup> / <i>u334</i> / <i>u334</i> | *** P<0.001 |

|                                   |    |                                   |     |         |                                   |    |                                   |     |         |
|-----------------------------------|----|-----------------------------------|-----|---------|-----------------------------------|----|-----------------------------------|-----|---------|
| <i>w</i> <sup>1118</sup>          | vs | <i>lgl</i> <sup>1/1</sup>         | *** | P<0.001 | <i>w</i> <sup>1118</sup>          | vs | <i>lgl</i> <sup>1/1</sup>         | **  | P<0.01  |
| <i>w</i> <sup>1118</sup>          | vs | uh1-Gal4/+                        | ns  | P>0.05  | <i>w</i> <sup>1118</sup>          | vs | uh1-Gal4/+                        | ns  | P>0.05  |
| <i>w</i> <sup>1118</sup>          | vs | uh1-Gal4 Rescue                   | ns  | P>0.05  | <i>w</i> <sup>1118</sup>          | vs | uh1-Gal4 Rescue                   | ns  | P>0.05  |
| <i>lgl</i> <sup>1/uh334</sup>     | vs | <i>lgl</i> <sup>uh334/uh334</sup> | ns  | P>0.05  | <i>lgl</i> <sup>1/uh334</sup>     | vs | <i>lgl</i> <sup>uh334/uh334</sup> | ns  | P>0.05  |
| <i>lgl</i> <sup>1/uh334</sup>     | vs | <i>lgl</i> <sup>1/1</sup>         | ns  | P>0.05  | <i>lgl</i> <sup>1/uh334</sup>     | vs | <i>lgl</i> <sup>1/1</sup>         | ns  | P>0.05  |
| <i>lgl</i> <sup>1/uh334</sup>     | vs | uh1-Gal4/+                        | *** | P<0.001 | <i>lgl</i> <sup>1/uh334</sup>     | vs | uh1-Gal4/+                        | *** | P<0.001 |
| <i>lgl</i> <sup>1/uh334</sup>     | vs | uh1-Gal4 Rescue                   | **  | P<0.01  | <i>lgl</i> <sup>1/uh334</sup>     | vs | uh1-Gal4 Rescue                   | **  | P<0.01  |
| <i>lgl</i> <sup>uh334/uh334</sup> | vs | <i>lgl</i> <sup>1/1</sup>         | ns  | P>0.05  | <i>lgl</i> <sup>uh334/uh334</sup> | vs | <i>lgl</i> <sup>1/1</sup>         | ns  | P>0.05  |
| <i>lgl</i> <sup>uh334/uh334</sup> | vs | uh1-Gal4/+                        | **  | P<0.01  | <i>lgl</i> <sup>uh334/uh334</sup> | vs | uh1-Gal4/+                        | *** | P<0.001 |
| <i>lgl</i> <sup>uh334/uh334</sup> | vs | uh1-Gal4 Rescue                   | *   | P<0.05  | <i>lgl</i> <sup>uh334/uh334</sup> | vs | uh1-Gal4 Rescue                   | **  | P<0.01  |
| <i>lgl</i> <sup>1/1</sup>         | vs | uh1-Gal4/+                        | *** | P<0.001 | <i>lgl</i> <sup>1/1</sup>         | vs | uh1-Gal4/+                        | **  | P<0.01  |
| <i>lgl</i> <sup>1/1</sup>         | vs | uh1-Gal4 Rescue                   | **  | P<0.01  | <i>lgl</i> <sup>1/1</sup>         | vs | uh1-Gal4 Rescue                   | *   | P<0.05  |
| uh1-Gal4/+                        | vs | uh1-Gal4 Rescue                   | ns  | P>0.05  | uh1-Gal4/+                        | vs | uh1-Gal4 Rescue                   | ns  | P>0.05  |

**(D) Fig. 6. Active zones**

| <u>Tukey–Kramer</u>           |    |                               |     | <u>Tukey–Kramer</u> |                               |    |                               |    |        |
|-------------------------------|----|-------------------------------|-----|---------------------|-------------------------------|----|-------------------------------|----|--------|
| Active zone size              |    |                               |     | Active zone number  |                               |    |                               |    |        |
| <i>w</i> <sup>1118</sup>      | vs | <i>lgl</i> <sup>1/4</sup>     | *** | P<0.001             | <i>w</i> <sup>1118</sup>      | vs | <i>lgl</i> <sup>1/4</sup>     | ** | P<0.01 |
| <i>w</i> <sup>1118</sup>      | vs | <i>lgl</i> <sup>1/uh334</sup> | *** | P<0.01              | <i>w</i> <sup>1118</sup>      | vs | <i>lgl</i> <sup>1/uh334</sup> | *  | P<0.05 |
| <i>w</i> <sup>1118</sup>      | vs | uh1-Gal4/+                    | ns  | P>0.05              | <i>w</i> <sup>1118</sup>      | vs | uh1-Gal4/+                    | ns | P>0.05 |
| <i>w</i> <sup>1118</sup>      | vs | uh1-Gal4 Rescue               | ns  | P>0.05              | <i>w</i> <sup>1118</sup>      | vs | uh1-Gal4 Rescue               | ns | P>0.05 |
| <i>lgl</i> <sup>1/4</sup>     | vs | <i>lgl</i> <sup>1/uh334</sup> | ns  | P>0.05              | <i>lgl</i> <sup>1/4</sup>     | vs | <i>lgl</i> <sup>1/uh334</sup> | ns | P>0.05 |
| <i>lgl</i> <sup>1/4</sup>     | vs | uh1-Gal4/+                    | *** | P<0.001             | <i>lgl</i> <sup>1/4</sup>     | vs | uh1-Gal4/+                    | ** | P<0.01 |
| <i>lgl</i> <sup>1/4</sup>     | vs | uh1-Gal4 Rescue               | *** | P<0.001             | <i>lgl</i> <sup>1/4</sup>     | vs | uh1-Gal4 Rescue               | *  | P<0.05 |
| <i>lgl</i> <sup>1/uh334</sup> | vs | uh1-Gal4/+                    | *** | P<0.001             | <i>lgl</i> <sup>1/uh334</sup> | vs | uh1-Gal4/+                    | *  | P<0.05 |
| <i>lgl</i> <sup>1/uh334</sup> | vs | uh1-Gal4 Rescue               | *** | P<0.001             | <i>lgl</i> <sup>1/uh334</sup> | vs | uh1-Gal4 Rescue               | *  | P<0.05 |
| uh1-Gal4/+                    | vs | uh1-Gal4 Rescue               | ns  | P>0.05              | uh1-Gal4/+                    | vs | uh1-Gal4 Rescue               | ns | P>0.05 |

**(E) Fig. 7. FM1-43**

**Student–Newman–Kuels multiple comparisons test**

| <u>Unloaded intensity</u>     |    |                               |    | <u>Unloaded/loaded intensity</u> |                               |    |                               |    |        |
|-------------------------------|----|-------------------------------|----|----------------------------------|-------------------------------|----|-------------------------------|----|--------|
| <i>lgl</i> <sup>1/4</sup>     | vs | <i>w</i> <sup>1118</sup>      | *  | P<0.05                           | <i>lgl</i> <sup>1/4</sup>     | vs | <i>w</i> <sup>1118</sup>      | ** | P<0.01 |
| <i>lgl</i> <sup>1/4</sup>     | vs | <i>lgl</i> <sup>1/uh334</sup> | ns | P>0.05                           | <i>lgl</i> <sup>1/4</sup>     | vs | <i>lgl</i> <sup>1/uh334</sup> | ns | P>0.05 |
| <i>lgl</i> <sup>1/uh334</sup> | vs | <i>w</i> <sup>1118</sup>      | *  | P<0.05                           | <i>lgl</i> <sup>1/uh334</sup> | vs | <i>w</i> <sup>1118</sup>      | *  | P<0.05 |

**(F) Fig. 8. GluR expression**

| <u>Dunn’s multiple comparisons test</u> |    |                               |     | <u>Student–Newman–Kuels multiple comparisons test</u> |                               |    |                               |    |        |
|-----------------------------------------|----|-------------------------------|-----|-------------------------------------------------------|-------------------------------|----|-------------------------------|----|--------|
| GluRIIC intensity                       |    |                               |     | GluRIIB intensity                                     |                               |    |                               |    |        |
| <i>w</i> <sup>1118</sup>                | vs | <i>lgl</i> <sup>1/4</sup>     | *** | P<0.001                                               | <i>w</i> <sup>1118</sup>      | vs | <i>lgl</i> <sup>1/4</sup>     | ** | P<0.01 |
| <i>w</i> <sup>1118</sup>                | vs | <i>lgl</i> <sup>1/uh334</sup> | *** | P<0.01                                                | <i>w</i> <sup>1118</sup>      | vs | <i>lgl</i> <sup>1/uh334</sup> | ** | P<0.01 |
| <i>w</i> <sup>1118</sup>                | vs | uh1-Gal4/+                    | ns  | P>0.05                                                | <i>lgl</i> <sup>1/uh334</sup> | vs | <i>lgl</i> <sup>1/4</sup>     | ns | P>0.05 |
| <i>w</i> <sup>1118</sup>                | vs | uh1-Gal4 Rescue               | ns  | P>0.05                                                |                               |    |                               |    |        |
| <i>lgl</i> <sup>1/4</sup>               | vs | <i>lgl</i> <sup>1/uh334</sup> | ns  | P>0.05                                                |                               |    |                               |    |        |
| <i>lgl</i> <sup>1/4</sup>               | vs | uh1-Gal4/+                    | *** | P<0.001                                               |                               |    |                               |    |        |
| <i>lgl</i> <sup>1/4</sup>               | vs | uh1-Gal4 Rescue               | *   | P<0.05                                                |                               |    |                               |    |        |
| <i>lgl</i> <sup>1/uh334</sup>           | vs | uh1-Gal4/+                    | *** | P<0.001                                               |                               |    |                               |    |        |

|                             |    |                 |    |        |
|-----------------------------|----|-----------------|----|--------|
| <i>lgl<sup>1/u334</sup></i> | vs | uh1-Gal4 Rescue | *  | P<0.05 |
| uh1-Gal4/+                  | vs | uh1-Gal4 Rescue | ns | P>0.05 |

---
